# Supplementary material for: Air Pollution and Urban Green Space: Evidence of Environmental Injustice in Adama, Ethiopia
Source: Frontiers journal article supplement (doi:10.3389/frsc.2021.728384), 2021-09-22
Supplement: Data_Sheet_1.pdf [file Data_Sheet_1.pdf]

## Supplementary Material

### Study population flowchart: Environmental exposures

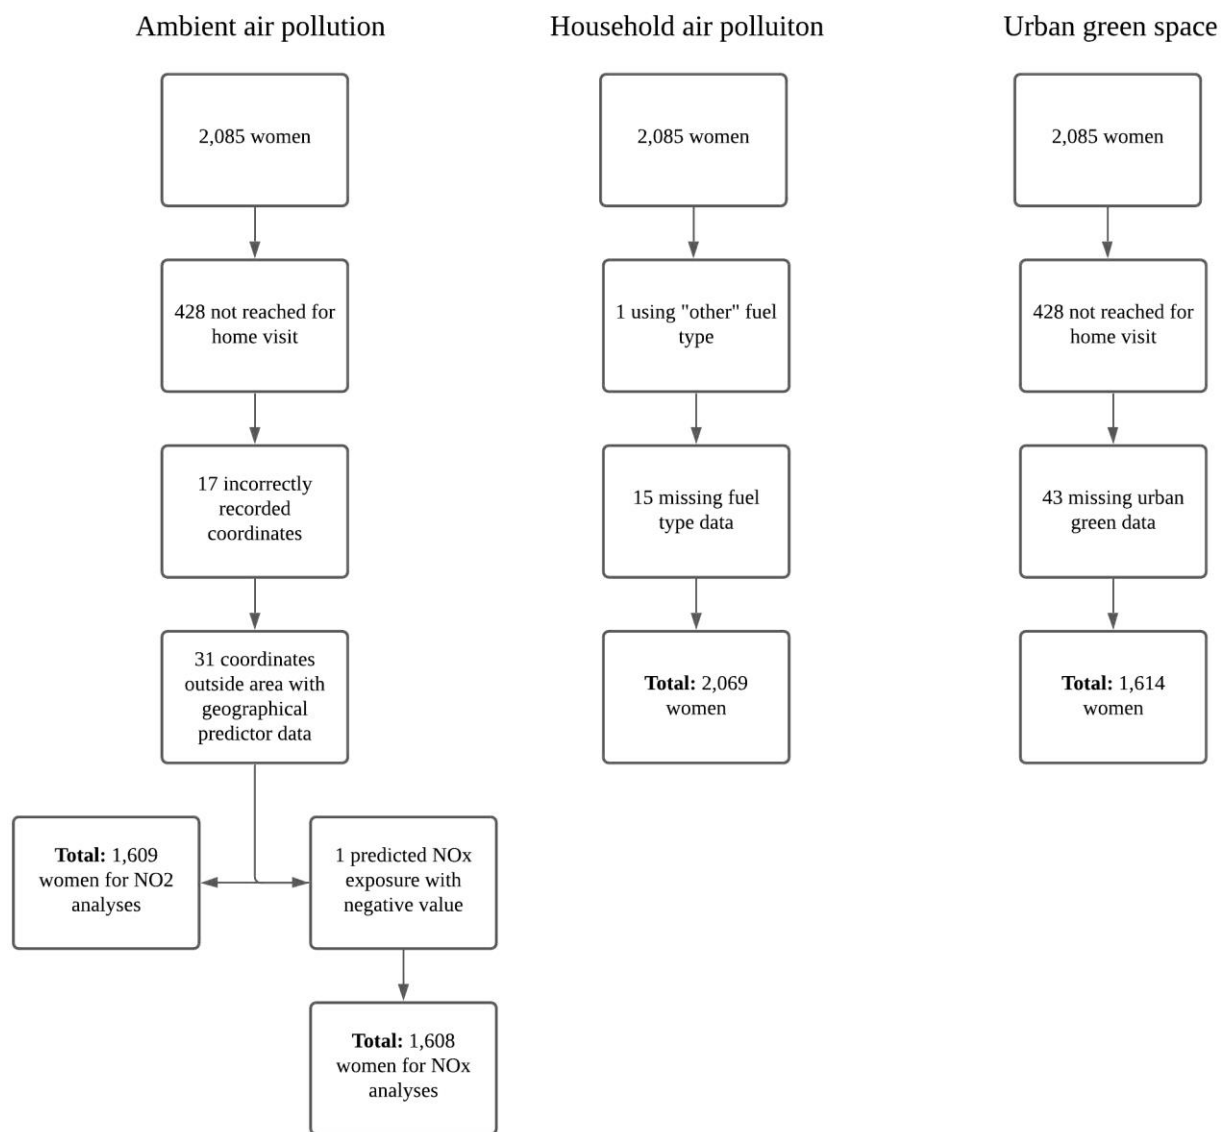

**Supplementary Figure 1.** Flowchart of the study population according to available data on environmental exposures.

**Supplementary Table 1.** Sensitivity analysis excluding women whose coordinates were recorded as “degree, minute, and second” (n = 238) for exploring the odds of being exposed to levels of NO<sub>2</sub> and NO<sub>x</sub> above the mean (13.70 and 29.89 µg/m<sup>3</sup>, respectively) associated with education level and occupation among women in the Adama Mother and Child cohort.

|                                    | <b>OR (95% CI)</b>    |                       |
|------------------------------------|-----------------------|-----------------------|
|                                    | <b>NO<sub>2</sub></b> | <b>NO<sub>x</sub></b> |
| <b>Education level</b>             | <b>N = 1,368</b>      | <b>N = 1,367</b>      |
| Illiterate and < Grade 6           | 1.67 (1.12-2.49)*     | 2.08 (1.39-3.12)**    |
| Grades 6-12                        | 1.59 (1.08-2.32)*     | 1.72 (1.17-2.53)**    |
| > Grade 12                         | REF                   | REF                   |
| <b>Education level<sup>a</sup></b> | <b>N = 1,368</b>      | <b>N = 1,367</b>      |
| Low                                | 1.13 (0.90-1.42)      | 1.31 (1.04-1.65)*     |
| High                               | REF                   | REF                   |
| <b>Occupation</b>                  | <b>N = 470</b>        | <b>N = 469</b>        |
| Daily laborer                      | 1.17 (0.80-1.70)      | 1.16 (0.80-1.68)      |
| Permanent employment               | REF                   | REF                   |

Number of included participants (N) is presented.

OR, Odds ratio. CI, Confidence interval. <sup>a</sup>Low = Illiterate and < Grade 6, High = Grades 6-12 and > Grade 12. REF, reference category. \* $p \leq 0.05$ . \*\* $p \leq 0.01$ .

**Supplementary Table 2.** Sensitivity analysis excluding women whose coordinates were recorded as “degree, minute, and second” (n = 238) for exploring the odds of being exposed to levels of NO<sub>2</sub> and NO<sub>x</sub> above 20 µg/m<sup>3</sup> associated with education level and occupation among women in the Adama Mother and Child cohort.

|                                    | <b>OR (95% CI)</b>    |                       |
|------------------------------------|-----------------------|-----------------------|
|                                    | <b>NO<sub>2</sub></b> | <b>NO<sub>x</sub></b> |
| <b>Education level</b>             | <b>N = 1,368</b>      | <b>N = 1,367</b>      |
| Illiterate and < Grade 6           | 5.33 (2.41-11.77)**   | 1.31 (0.76-2.26)      |
| Grades 6-12                        | 4.16 (1.90-9.08)**    | 1.63 (0.97-2.75)      |
| > Grade 12                         | REF                   | REF                   |
| <b>Education level<sup>a</sup></b> | <b>N = 1,368</b>      | <b>N = 1,367</b>      |
| Low                                | 1.48 (1.11-1.98)**    | 0.88 (0.61-1.26)      |
| High                               | REF                   | REF                   |
| <b>Occupation</b>                  | <b>N = 470</b>        | <b>N = 469</b>        |
| Daily laborer                      | 1.64 (0.98-2.74)      | 1.23 (0.62-2.47)      |
| Permanent employment               | REF                   | REF                   |

Number of included participants (N) is presented.

OR, Odds ratio. CI, Confidence interval. <sup>a</sup>Low = Illiterate and < Grade 6, High = Grades 6-12 and > Grade 12. REF, reference category. \**p* ≤ 0.05. \*\**p* ≤ 0.01.

**Supplementary Table 3.** Socioeconomic characteristics of the women who were reached for a home visit and those who were not (N = 428).

|                        | Reached for home visit, n (%) |            |
|------------------------|-------------------------------|------------|
|                        | Yes                           | No         |
| <b>Education level</b> |                               |            |
| Illiterate             | 195 (11.8)                    | 71 (16.7)  |
| < Grade 6              | 326 (19.7)                    | 84 (19.7)  |
| Grades 6-12            | 939 (56.8)                    | 233 (54.7) |
| > Grade 12             | 193 (11.7)                    | 38 (8.9)   |
| <b>Occupation</b>      |                               |            |
| Daily laborer          | 198 (12.0)                    | 50 (11.8)  |
| Permanent employment   | 236 (14.3)                    | 38 (8.9)   |
| Self-employed          | 124 (7.5)                     | 39 (9.2)   |
| Homemaker              | 1,041 (63.1)                  | 278 (65.4) |
| Student                | 29 (1.8)                      | 13 (3.1)   |
| Unemployed             | 22 (1.3)                      | 7 (1.6)    |

**Supplementary Table 4.** Socioeconomic characteristics of the women with missing data on the presence of green space, including those not reached for a home visit, in their residential area (N = 471).

|                        | Presence of green space, n (%) |            |            |
|------------------------|--------------------------------|------------|------------|
|                        | Yes                            | No         | Missing    |
| <b>Education level</b> |                                |            |            |
| Illiterate             | 93 (35.0)                      | 95 (35.7)  | 78 (29.3)  |
| < Grade 6              | 165 (40.2)                     | 155 (37.8) | 90 (22.0)  |
| Grades 6-12            | 543 (46.3)                     | 370 (31.6) | 259 (22.1) |
| > Grade 12             | 142 (61.5)                     | 47 (20.3)  | 42 (18.2)  |
| <b>Occupation</b>      |                                |            |            |
| Daily laborer          | 76 (30.6)                      | 113 (45.6) | 59 (23.8)  |
| Permanent employment   | 153 (55.8)                     | 77 (28.1)  | 44 (16.1)  |
| Self-employed          | 59 (36.2)                      | 62 (38.0)  | 42 (25.8)  |
| Homemaker              | 619 (46.9)                     | 398 (30.2) | 302 (22.9) |
| Student                | 22 (52.4)                      | 6 (14.3)   | 14 (33.3)  |
| Unemployed             | 13 (44.8)                      | 9 (31.0)   | 7 (24.1)   |
